# Supplementary material for: A stretchable and sensitive light-emitting fabric
Source: Royal Society of Chemistry journal article supplement (doi:10.1039/c6tc05156a), 2017-01-01
Supplement: c6tc05156a1.pdf [file c6tc05156a1.pdf]

## Supplementary Information

### Experimental Section

*Materials.* Stretchable spandex fabrics were obtained from Chao Fan Bu Ye Company. Pyrrole and naphthalene-2,6-disulfonic acid disodium salt ( $\text{Na}_2\text{NDS}$ ) were obtained from J&K Scientific. Ferric chloride hexahydrate ( $\text{FeCl}_3 \cdot 6\text{H}_2\text{O}$ ) was purchased from Sinopharm Chemical Reagent Co., Ltd. Ammonium persulfate, acrylamide, lithium chloride, N, N'-methylenebisacrylamide and N, N, N', N'-tetramethylethylenediamine were purchased from Sigma-Aldrich. Silicones (Ecoflex 00-30) were purchased from Smooth-On Inc. Transition metal-doped ZnS phosphors were produced by Global Tungsten & Powders Corp.

*Characterization.* The structures were characterized by scanning electron microscopy (Hitachi FE-SEM S-4800 operated at 1 kV). Transmittance spectra were recorded by a Shimadzu UV-2550 spectrophotometer. The electrical properties were tested by a Keithley 2400 source meter. Resistance of the hydrogel film under stretching was measured by a Keithley 2410 source meter with a square pulse function at 1 kHz. The light intensity of the stretchable light-emitting fabric was measured by a Photoresearch PR-680 under an alternating current waveform using a high-voltage amplifier (610 D; TREK Inc.) combined with a function generator (3312 A; Hewlett Packard). Capacitance was measured with a capacitance meter (830C; BK Precision). The stretching and pressing process of light-emitting fabric was conducted by an HY0350 Table-top Universal Testing Instrument.

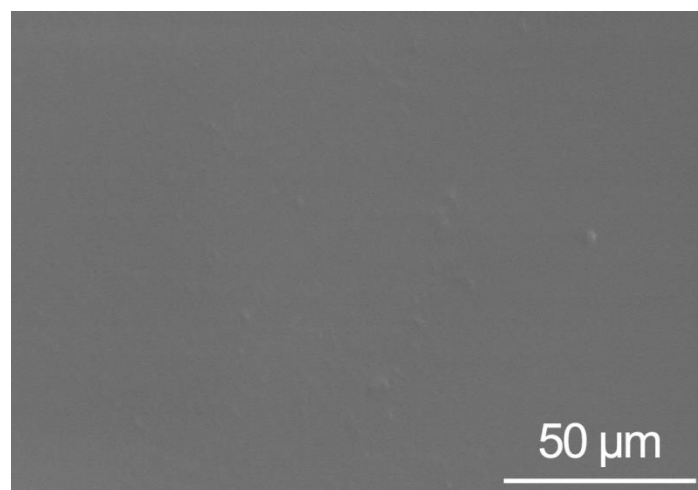

**Fig. S1** SEM image of the light-emitting layer.

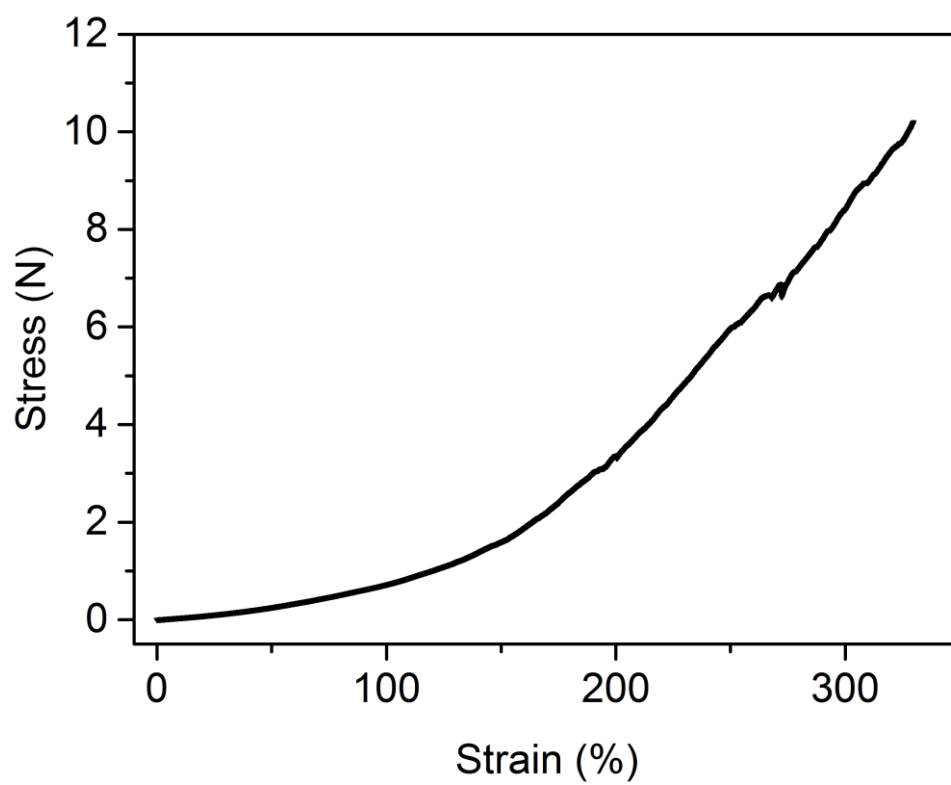

**Fig. S2** Stress-strain curve of the conducting fabric (width of 4 mm and length of 13 mm).

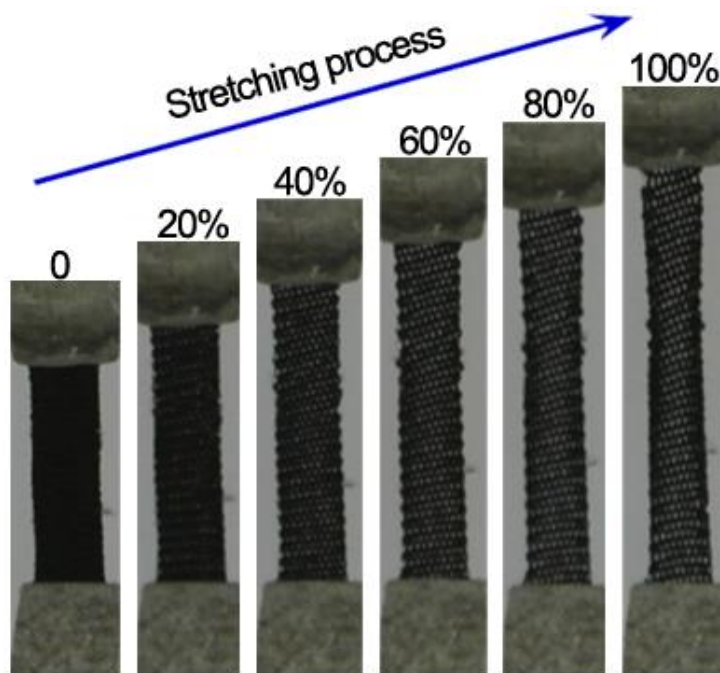

**Fig. S3** Photographs of the conducting fabric at increasing strains from left to right.

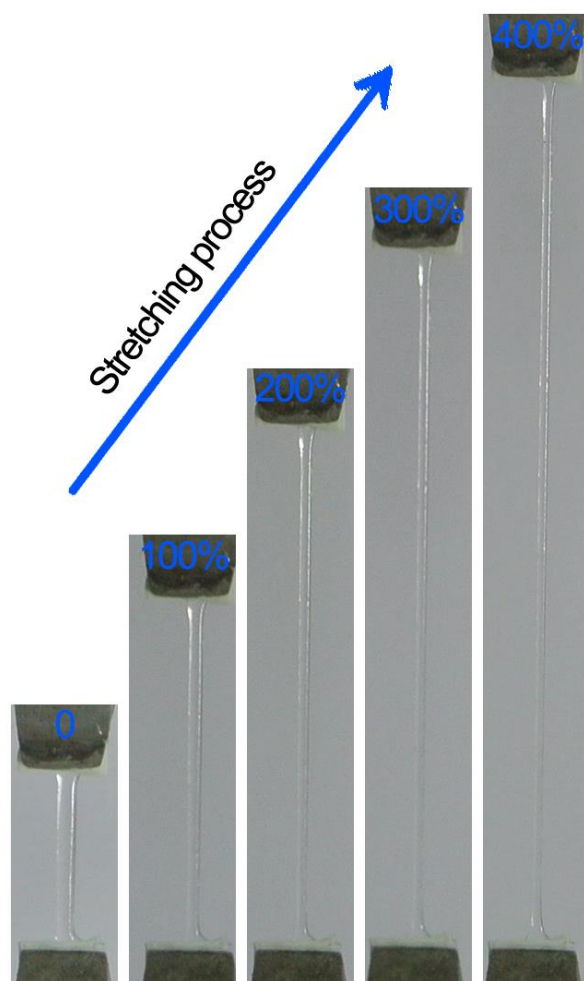

**Fig. S4** Photographs of the hydrogel layer with the increasing strains from 0 to 400%.

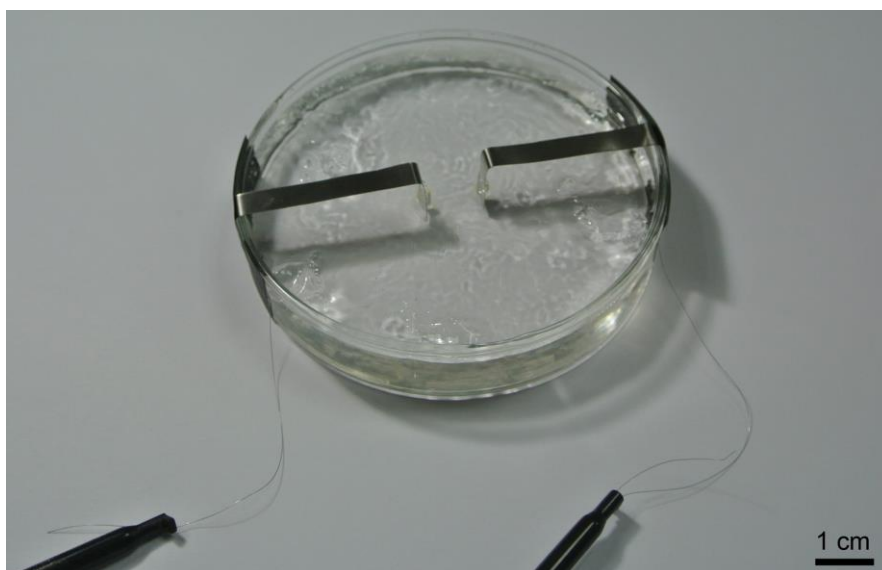

**Fig. S5** Photograph of measuring the ionic conductivity of hydrogel film.

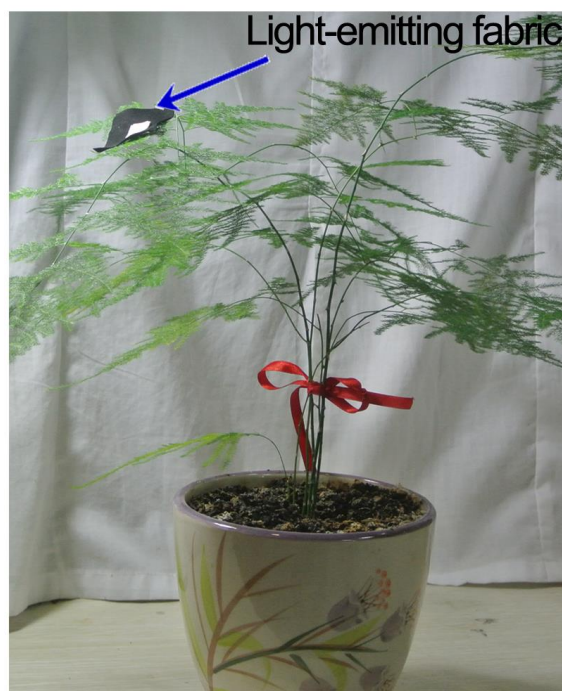

**Fig. S6** Photograph of the light-emitting fabric being placed on a flower.

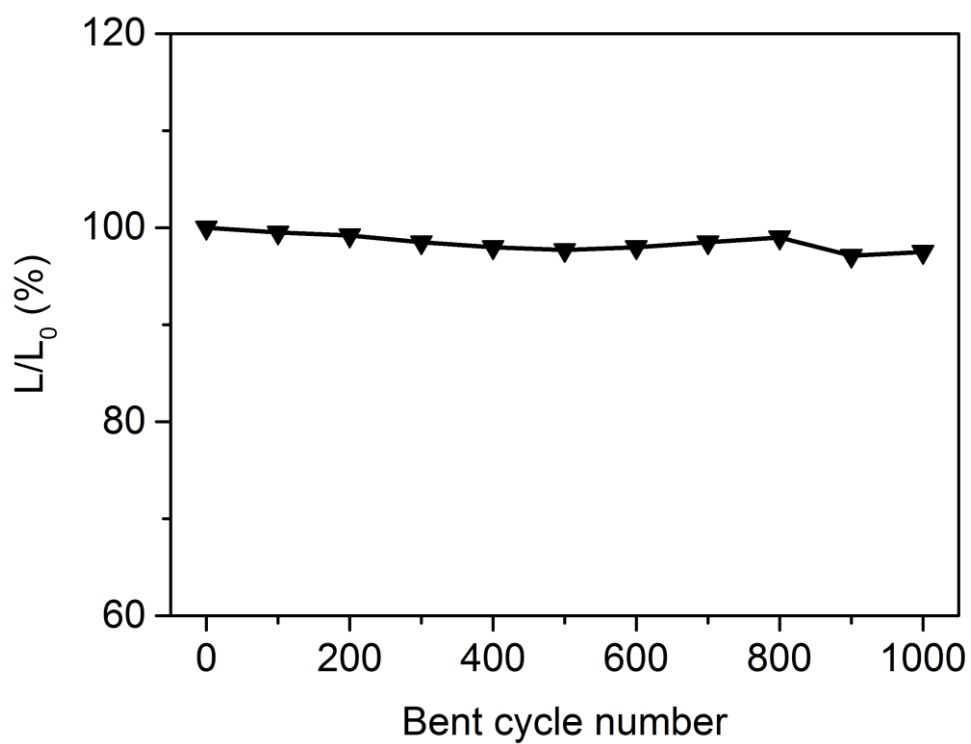

**Fig. S7** Dependence of luminance of the light-emitting fabric on bent cycle number.  $L_0$  and  $L$  correspond to the luminance intensities before and after bending, respectively.
